# Supplementary material for: Vascular dementia has the highest hospitalisation rate in China: a nationwide hospital information system study
Source: HighWire-hosted journal article supplement (doi:10.1136/svn-2022-001637), 2022-09-06
Supplement: svn-2022-001637supp001_data_supplement.pdf [file svn-2022-001637supp001_data_supplement.pdf]

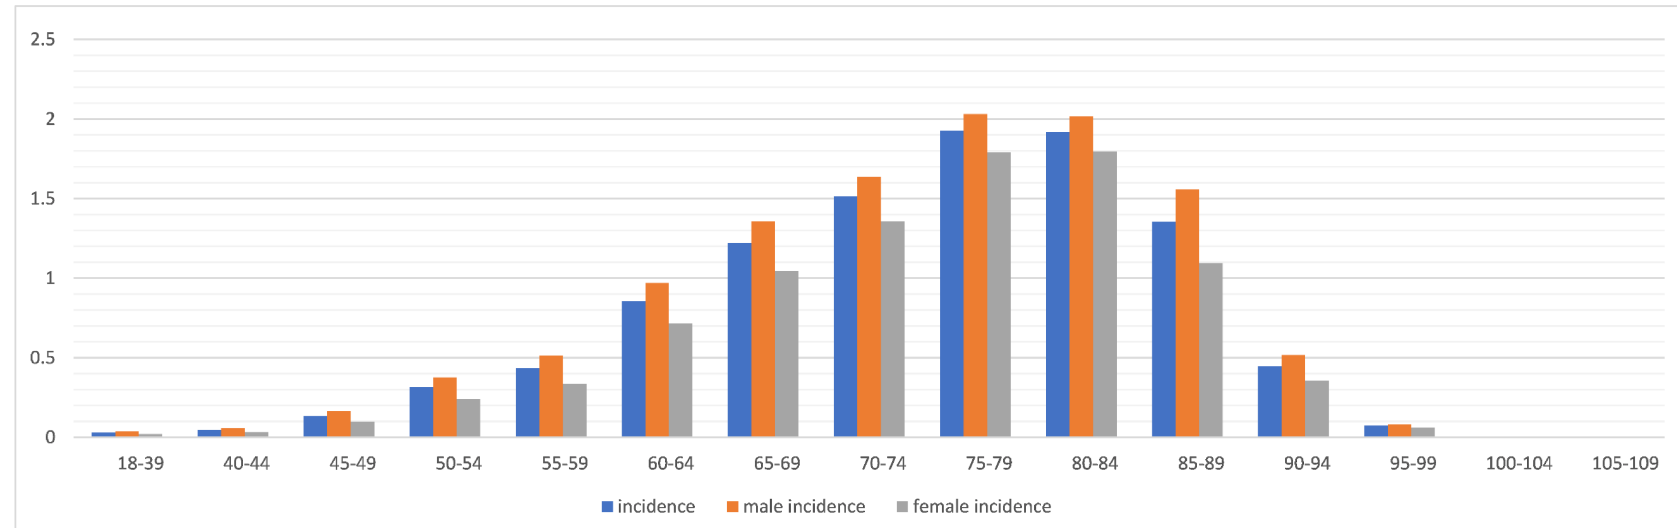

Supplementary Figure 1. The incidence of VaD grouped by age and gender  
Supplementary Figure 1 showed the distribution of VaD at different age and gender.
